# Supplementary material for: Improved catalog of NO x point source emissions (version 2)
Source: Copernicus journal article supplement (doi:10.5194/essd-15-3051-2023), 2023-07-18
Supplement: Supplementary file 1 [file essd-15-3051-2023-supplement.zip]

This Supplement provides regional results of the NO<sub>x</sub> point source catalog v2. Maps of  $A^*$  and tables of the corresponding top ten regional emitters are shown for the "regions of interest" that were defined in Beirle et al., 2021. In addition, we provide a table of those point sources listed in v2 of the catalog at locations not covered by those "regions of interest".

## 1 North America

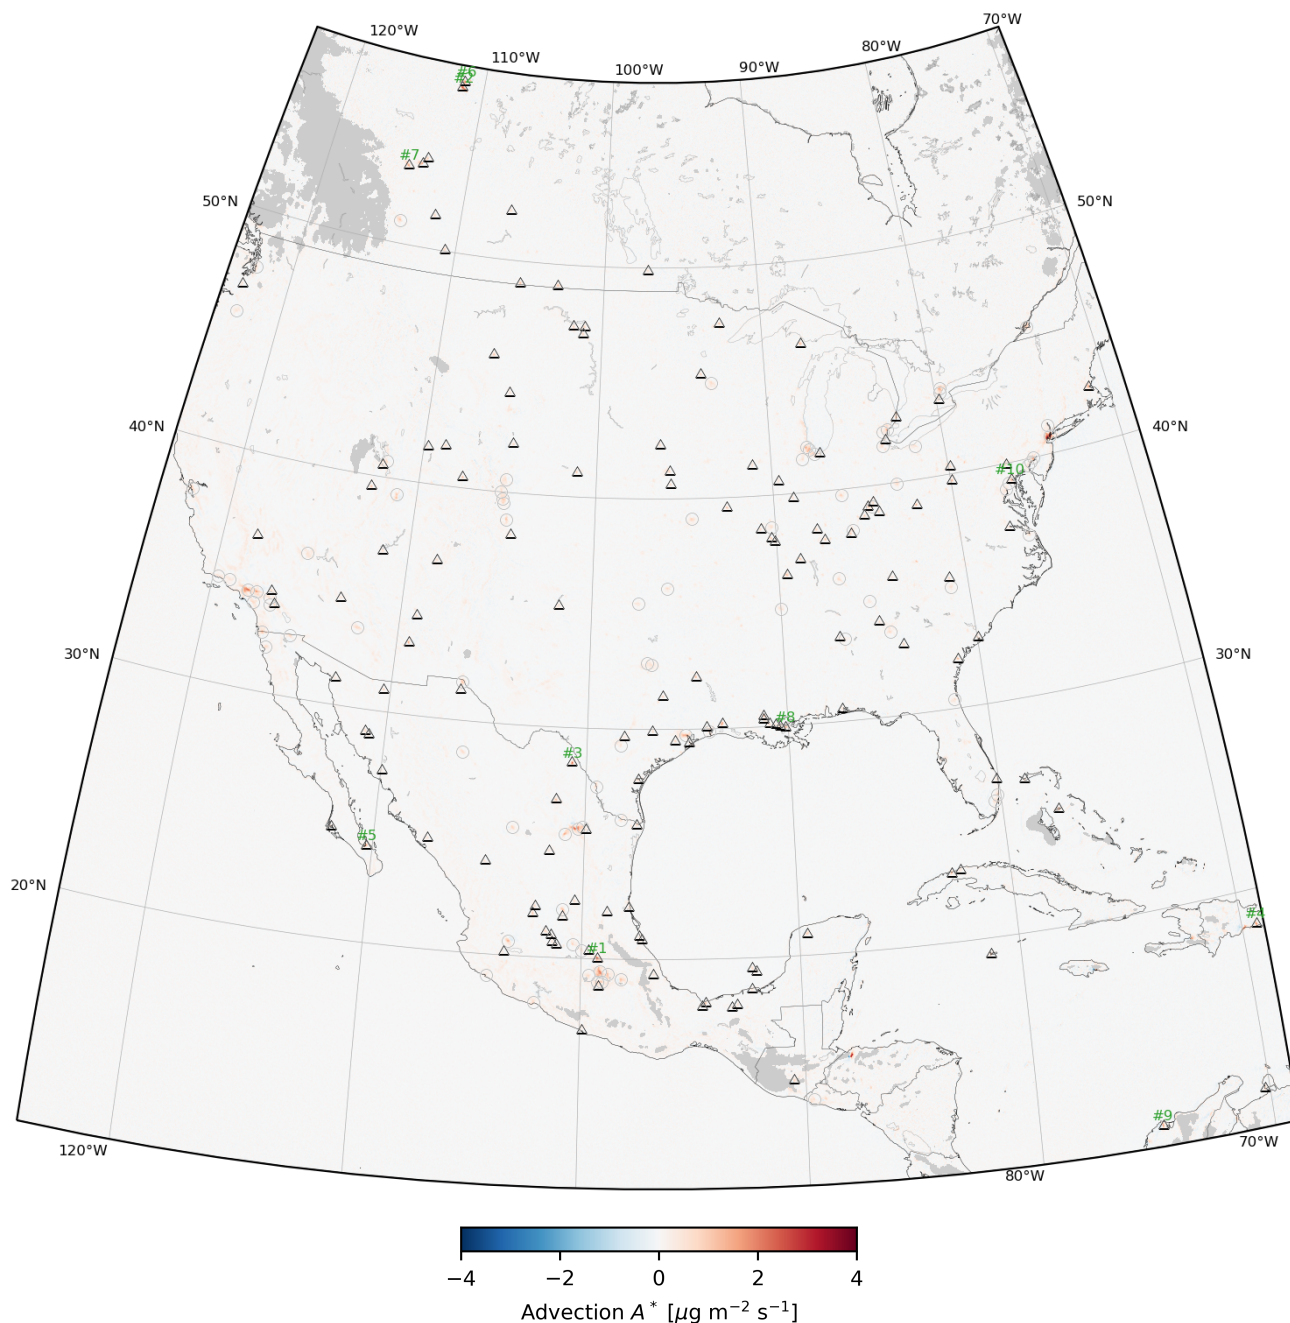

**Figure S1.** Map of  $A^*$  for North America. Point sources listed in the catalog v2 are displayed as triangle. The regional top ten emitters are labeled in green. Candidates classified as area source are shown as circle if local advection is larger than  $0.5 \mu\text{g s}^{-1} \text{m}^{-2}$ .

**Table S1.** Catalog v2 extract of ten largest point sources detected in North America.

| regional<br>rank | global<br>rank | lat [° N] | lon [° E] | Emissions<br>[kg/s] | Error<br>[kg/s] | Power plants (GPPD) <sup>1</sup> | Cities (WCD) <sup>1</sup> |
|------------------|----------------|-----------|-----------|---------------------|-----------------|----------------------------------|---------------------------|
| 1                | 33             | 20.0375   | -99.2625  | 1.10                | 0.75            | Francisco Pérez Ríos (Tula)      |                           |
| 2                | 85             | 57.0625   | -111.6875 | 0.65                | 0.11            | Poplar Creek                     |                           |
| 3                | 148            | 28.4875   | -100.7125 | 0.51                | 0.09            | Carbón II                        |                           |
| 4                | 175            | 18.5375   | -69.3375  | 0.47                | 0.11            | Quisqueya 2                      | San Pedro de Macorís      |
| 5                | 185            | 24.1875   | -110.2875 | 0.46                | 0.12            | Punta Prieta II                  | La Paz                    |
| 6                | 187            | 57.3125   | -111.5625 | 0.45                | 0.08            | Muskeg River                     |                           |
| 7                | 193            | 53.3625   | -114.3125 | 0.44                | 0.04            | Genesee                          |                           |
| 8                | 210            | 29.9375   | -90.1375  | 0.42                | 0.10            | Nine Mile Point                  | Metairie                  |
| 9                | 213            | 10.9125   | -74.7625  | 0.41                | 0.18            | Termobarranquilla                | Barranquilla              |
| 10               | 220            | 39.2875   | -76.6625  | 0.40                | 0.05            | Westport                         | Baltimore                 |

<sup>1</sup>GPPD power plants / WCD cities within 15 km. Here, only the first match is listed. In the original catalog ([https://doi.org/10.26050/WDCC/No\\_xPointEmissionsV2](https://doi.org/10.26050/WDCC/No_xPointEmissionsV2)), all matches are included. Note that the listed power plant or city does not need to represent the actual dominating NO<sub>x</sub> source.

2 South America

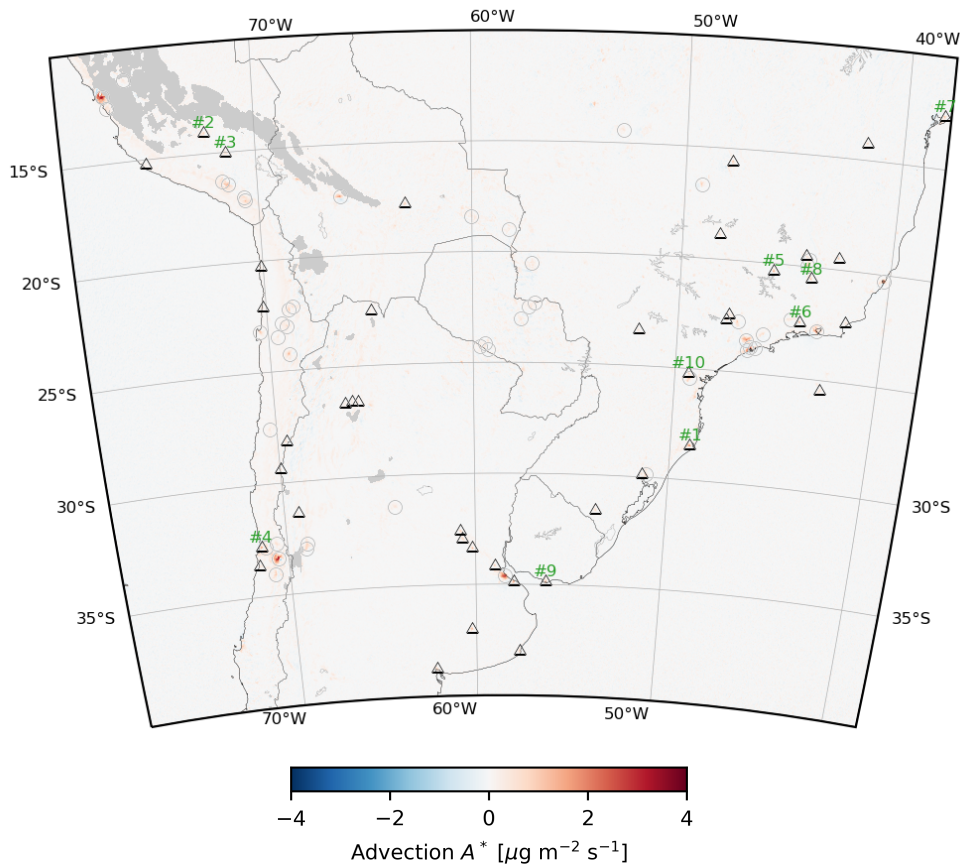

**Figure S2.** Map of  $A^*$  for South America. Point sources listed in the catalog v2 are displayed as triangle. The regional top ten emitters are labeled in green. Candidates classified as area source are shown as circle if local advection is larger than  $0.5 \mu\text{g s}^{-1} \text{m}^{-2}$ .

**Table S2.** Catalog v2 extract of ten largest point sources detected in South America.

| regional rank | global rank | lat [° N] | lon [° E] | Emissions [kg/s] | Error [kg/s] | Power plants (GPPD) <sup>1</sup> | Cities (WCD) <sup>1</sup> |
|---------------|-------------|-----------|-----------|------------------|--------------|----------------------------------|---------------------------|
| 1             | 176         | -28.4375  | -49.0125  | 0.47             | 0.12         | Jorge Lacerda IV                 |                           |
| 2             | 290         | -14.0625  | -72.3125  | 0.33             | 0.13         |                                  |                           |
| 3             | 300         | -15.0125  | -71.3875  | 0.32             | 0.11         |                                  |                           |
| 4             | 321         | -32.7875  | -71.3875  | 0.30             | 0.12         | VENTANAS                         |                           |
| 5             | 333         | -20.3125  | -45.5875  | 0.30             | 0.09         |                                  |                           |
| 6             | 334         | -22.5125  | -44.1125  | 0.30             | 0.08         |                                  | Volta Redonda             |
| 7             | 389         | -12.6625  | -38.3125  | 0.27             | 0.07         | Camaçari                         | Camaçari                  |
| 8             | 390         | -20.5375  | -43.7625  | 0.27             | 0.10         | Açominas                         | Conselheiro Lafaiete      |
| 9             | 398         | -34.8625  | -56.2125  | 0.27             | 0.07         | CTR                              | Montevideo                |
| 10            | 404         | -25.2125  | -49.3125  | 0.26             | 0.06         |                                  | Colombo                   |

<sup>1</sup> GPPD power plants / WCD cities within 15 km. Here, only the first match is listed. In the original catalog ([https://doi.org/10.26050/WDCC/No\\_xPointEmissionsV2](https://doi.org/10.26050/WDCC/No_xPointEmissionsV2)), all matches are included. Note that the listed power plant or city does not need to represent the actual dominating NO<sub>x</sub> source.

3 Europe

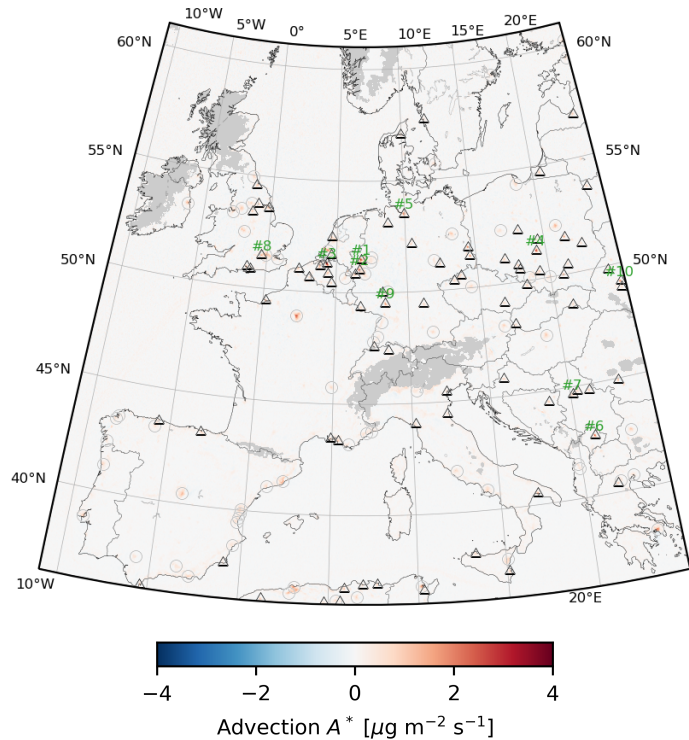

**Figure S3.** Map of  $A^*$  for Europe. Point sources listed in the catalog v2 are displayed as triangle. The regional top ten emitters are labeled in green. Candidates classified as area source are shown as circle if local advection is larger than  $0.5 \mu\text{g s}^{-1} \text{m}^{-2}$ .

**Table S3.** Catalog v2 extract of ten largest point sources detected in Europe.

| regional<br>rank | global<br>rank | lat [° N] | lon [° E] | Emissions<br>[kg/s] | Error<br>[kg/s] | Power plants (GPPD) <sup>1</sup> | Cities (WCD) <sup>1</sup> |
|------------------|----------------|-----------|-----------|---------------------|-----------------|----------------------------------|---------------------------|
| 1                | 65             | 51.4875   | 6.7375    | 0.73                | 0.09            | KW Walsum                        | Duisburg                  |
| 2                | 71             | 51.0125   | 6.6375    | 0.71                | 0.10            | Niederaussem                     |                           |
| 3                | 79             | 51.2875   | 4.3125    | 0.66                | 0.08            | INESCO WKK                       | Antwerp                   |
| 4                | 140            | 51.2625   | 19.3125   | 0.53                | 0.08            | Bełchatów                        |                           |
| 5                | 168            | 53.5125   | 9.9375    | 0.49                | 0.05            | Hamburg-Moorburg                 | Hamburg                   |
| 6                | 173            | 42.6875   | 21.0625   | 0.48                | 0.09            | Kosovo A Coal Power Plant        |                           |
| 7                | 186            | 44.6625   | 20.1625   | 0.45                | 0.07            | TENT A                           |                           |
| 8                | 191            | 51.4625   | -0.4125   | 0.44                | 0.05            | Taylor's Lane GT                 | Slough                    |
| 9                | 270            | 49.5125   | 8.4375    | 0.34                | 0.05            | GKM (Mannheim)                   | Mannheim                  |
| 10               | 298            | 49.2125   | 24.6625   | 0.32                | 0.06            | Burshtyn                         |                           |

<sup>1</sup>GPPD power plants / WCD cities within 15 km. Here, only the first match is listed. In the original catalog ([https://doi.org/10.26050/WDCC/No\\_xPointEmissionsV2](https://doi.org/10.26050/WDCC/No_xPointEmissionsV2)), all matches are included. Note that the listed power plant or city does not need to represent the actual dominating NO<sub>x</sub> source.



4 West Africa

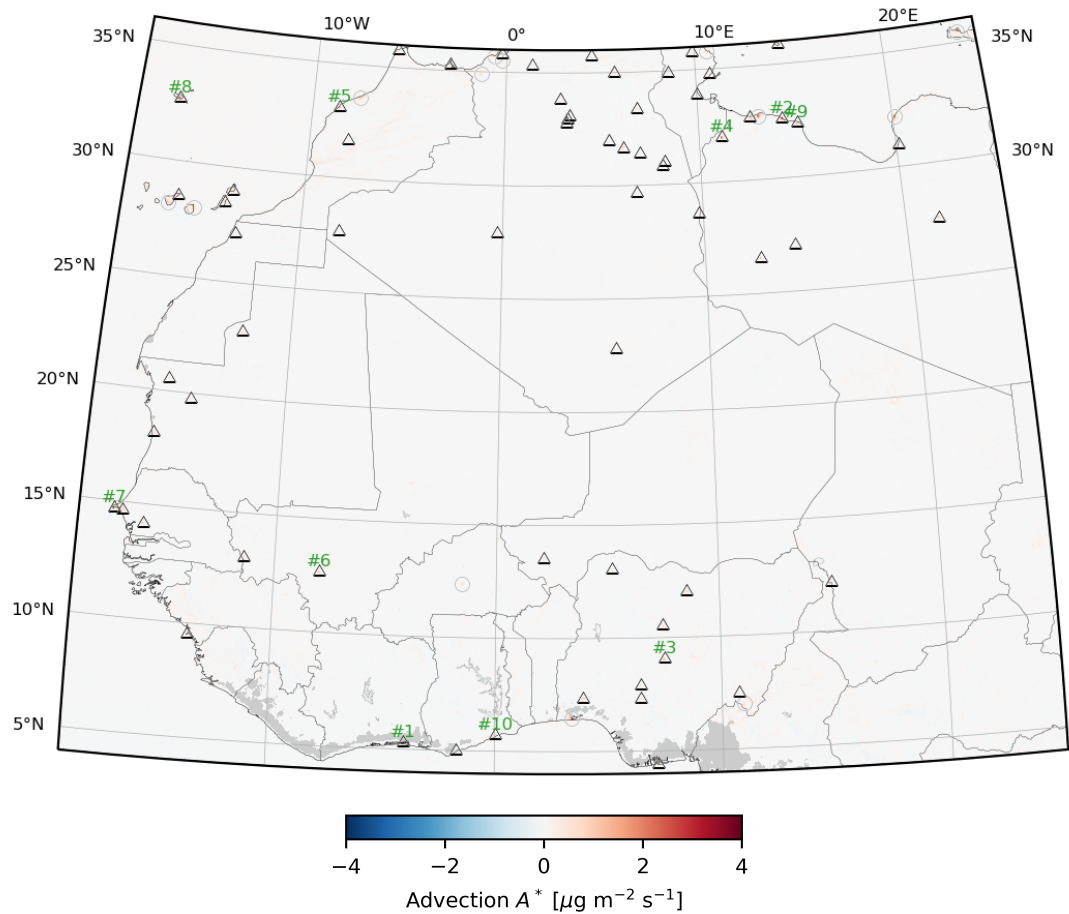

**Figure S4.** Map of  $A^*$  for West Africa. Point sources listed in the catalog v2 are displayed as triangle. The regional top ten emitters are labeled in green. Candidates classified as area source are shown as circle if local advection is larger than  $0.5 \mu\text{g s}^{-1} \text{m}^{-2}$ .

**Table S4.** Catalog v2 extract of ten largest point sources detected in West Africa.

| regional rank | global rank | lat [° N] | lon [° E] | Emissions [kg/s] | Error [kg/s] | Power plants (GPPD) <sup>1</sup> | Cities (WCD) <sup>1</sup> |
|---------------|-------------|-----------|-----------|------------------|--------------|----------------------------------|---------------------------|
| 1             | 76          | 5.2875    | -4.0125   | 0.70             | 0.30         | Azito OCGT                       | Abidjan                   |
| 2             | 87          | 32.6125   | 14.3375   | 0.65             | 0.16         | Al Khums                         | Al Khums                  |
| 3             | 127         | 9.0625    | 7.4875    | 0.56             | 0.28         |                                  | Abuja                     |
| 4             | 157         | 31.9625   | 11.1625   | 0.50             | 0.08         | Western Mountain Ruwais          |                           |
| 5             | 219         | 33.0875   | -8.6375   | 0.41             | 0.10         | Jorf Lasfar (JLEC)               |                           |
| 6             | 226         | 12.6375   | -7.9875   | 0.39             | 0.12         |                                  | Bamako                    |
| 7             | 233         | 14.6875   | -17.4125  | 0.39             | 0.12         |                                  | Pikine                    |
| 8             | 234         | 32.6875   | -16.9125  | 0.38             | 0.10         |                                  | Funchal                   |
| 9             | 280         | 32.3625   | 15.0875   | 0.33             | 0.08         | Misrata                          | Misratah                  |
| 10            | 292         | 5.7125    | 0.0125    | 0.33             | 0.13         | Tema                             | Tema                      |

<sup>1</sup> GPPD power plants / WCD cities within 15 km. Here, only the first match is listed. In the original catalog ([https://doi.org/10.26050/WDCC/No\\_xPointEmissionsV2](https://doi.org/10.26050/WDCC/No_xPointEmissionsV2)), all matches are included. Note that the listed power plant or city does not need to represent the actual dominating NO<sub>x</sub> source.

## 5 South Africa

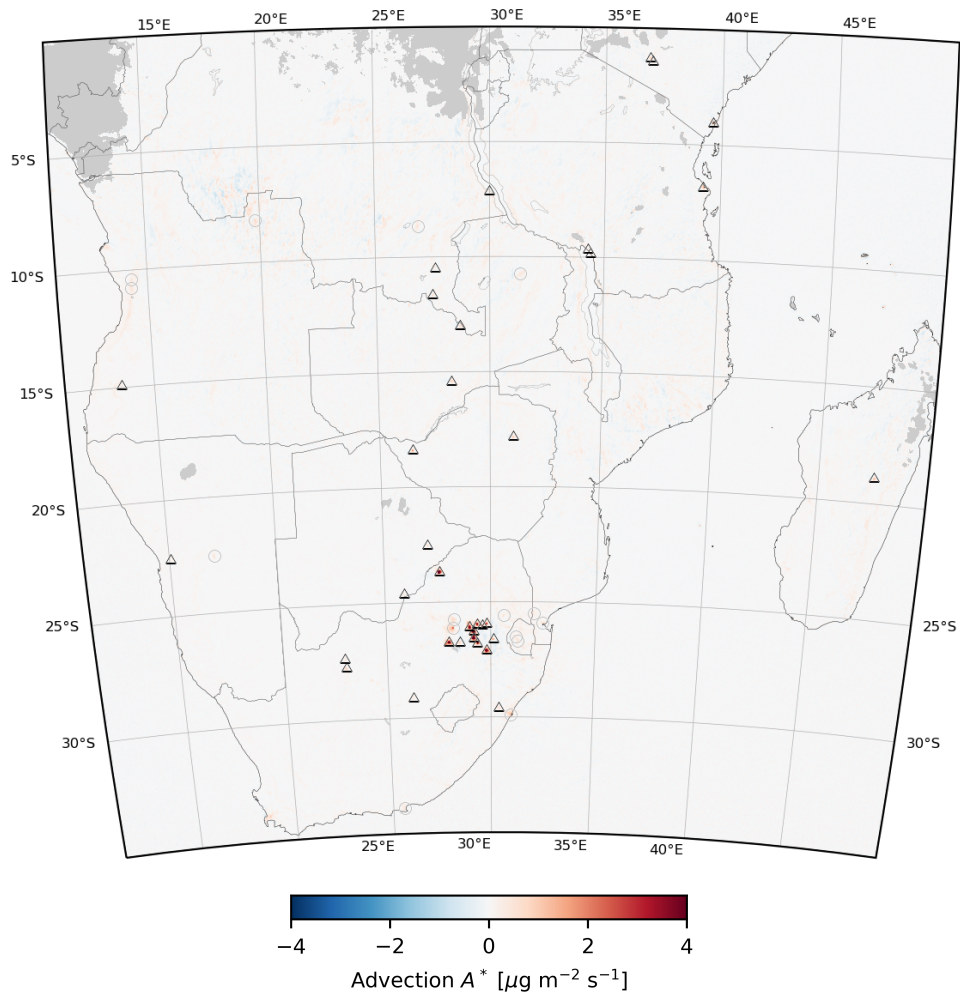

**Figure S5.** Map of  $A^*$  for South Africa. Point sources listed in the catalog v2 are displayed as triangle. The regional top ten emitters are labeled in green. Candidates classified as area source are shown as circle if local advection is larger than  $0.5 \mu\text{g s}^{-1} \text{m}^{-2}$ .

**Table S5.** Catalog v2 extract of ten largest point sources detected in South Africa.

| regional<br>rank | global<br>rank | lat [° N] | lon [° E] | Emissions<br>[kg/s] | Error<br>[kg/s] | Power plants (GPPD) <sup>1</sup> | Cities (WCD) <sup>1</sup> |
|------------------|----------------|-----------|-----------|---------------------|-----------------|----------------------------------|---------------------------|
| 1                | 1              | -26.2875  | 29.1625   | 2.76                | 0.47            | Matla                            | Vereeniging               |
| 2                | 2              | -26.5625  | 29.1625   | 2.47                | 0.39            |                                  |                           |
| 3                | 3              | -23.6875  | 27.5875   | 2.47                | 0.56            | Matimba                          |                           |
| 4                | 4              | -26.7375  | 27.9875   | 2.03                | 0.44            | Lethabo                          |                           |
| 5                | 5              | -27.1125  | 29.7875   | 2.03                | 0.31            | Majuba                           |                           |
| 6                | 9              | -26.0875  | 28.9875   | 1.74                | 0.32            | Kendal                           |                           |
| 7                | 22             | -25.9875  | 29.3625   | 1.21                | 0.23            | Duvha                            |                           |
| 8                | 29             | -26.7875  | 29.3625   | 1.17                | 0.18            | Tutuka                           |                           |
| 9                | 75             | -25.9375  | 29.7875   | 0.71                | 0.13            | Arnot                            |                           |
| 10               | 114            | -26.0375  | 29.6125   | 0.61                | 0.11            | Hendrina                         |                           |

<sup>1</sup>GPPD power plants / WCD cities within 15 km. Here, only the first match is listed. In the original catalog ([https://doi.org/10.26050/WDCC/No\\_xPointEmissionsV2](https://doi.org/10.26050/WDCC/No_xPointEmissionsV2)), all matches are included. Note that the listed power plant or city does not need to represent the actual dominating NO<sub>x</sub> source.

6 West Russia/East Europe

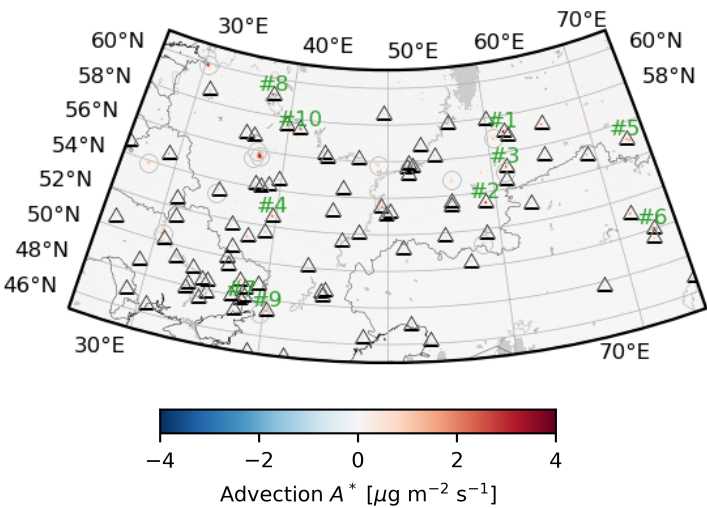

**Figure S6.** Map of  $A^*$  for West Russia/East Europe. Point sources listed in the catalog v2 are displayed as triangle. The regional top ten emitters are labeled in green. Candidates classified as area source are shown as circle if local advection is larger than  $0.5 \mu\text{g s}^{-1} \text{m}^{-2}$ .

**Table S6.** Catalog v2 extract of ten largest point sources detected in West Russia/East Europe.

| regional<br>rank | global<br>rank | lat [° N] | lon [° E] | Emissions<br>[kg/s] | Error<br>[kg/s] | Power plants (GPPD) <sup>1</sup> | Cities (WCD) <sup>1</sup> |
|------------------|----------------|-----------|-----------|---------------------|-----------------|----------------------------------|---------------------------|
| 1                | 19             | 57.1125   | 61.7125   | 1.23                | 0.12            | Reftinskaya GRES                 |                           |
| 2                | 49             | 53.4375   | 59.0375   | 0.91                | 0.11            | CHP Plant of MMK                 | Magnitogorsk              |
| 3                | 61             | 55.1875   | 61.4125   | 0.78                | 0.07            | Chelyabinsk CHP-1                | Chelyabinsk               |
| 4                | 80             | 52.5625   | 39.6375   | 0.66                | 0.09            | Lipetsk CHPP-2                   | Lipetsk                   |
| 5                | 82             | 55.0625   | 73.2375   | 0.65                | 0.06            | Omskaya-4                        | Omsk                      |
| 6                | 88             | 50.0375   | 73.0375   | 0.65                | 0.12            | Karaganda TPS-2                  | Temirtaū                  |
| 7                | 90             | 47.8125   | 37.9875   | 0.64                | 0.08            | Starobeshivska                   |                           |
| 8                | 102            | 59.1375   | 37.8375   | 0.63                | 0.10            | CHP-PVS                          | Cherepovets               |
| 9                | 128            | 47.4125   | 40.2125   | 0.56                | 0.06            | Novocherkasskaya GRES            | Novocherkassk             |
| 10               | 135            | 57.4625   | 41.1625   | 0.54                | 0.06            | Krostromskaya                    |                           |

<sup>1</sup> GPPD power plants / WCD cities within 15 km. Here, only the first match is listed. In the original catalog ([https://doi.org/10.26050/WDCC/No\\_xPointEmissionsV2](https://doi.org/10.26050/WDCC/No_xPointEmissionsV2)), all matches are included. Note that the listed power plant or city does not need to represent the actual dominating NO<sub>x</sub> source.



7 Siberia/Mongolia

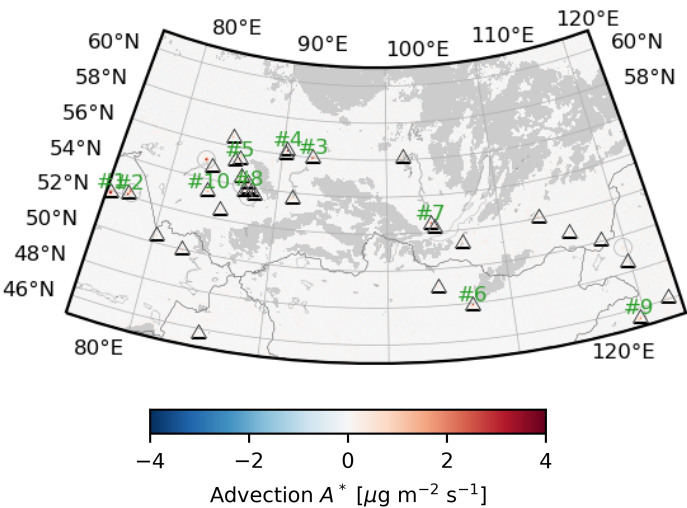

**Figure S7.** Map of  $A^*$  for Siberia/Mongolia. Point sources listed in the catalog v2 are displayed as triangle. The regional top ten emitters are labeled in green. Candidates classified as area source are shown as circle if local advection is larger than  $0.5 \mu\text{g s}^{-1} \text{m}^{-2}$ .

**Table S7.** Catalog v2 extract of ten largest point sources detected in Siberia/Mongolia.

| regional<br>rank | global<br>rank | lat [° N] | lon [° E] | Emissions<br>[kg/s] | Error<br>[kg/s] | Power plants (GPPD) <sup>1</sup> | Cities (WCD) <sup>1</sup> |
|------------------|----------------|-----------|-----------|---------------------|-----------------|----------------------------------|---------------------------|
| 1                | 21             | 51.8875   | 75.3875   | 1.21                | 0.13            | Ekibastuz-1                      |                           |
| 2                | 56             | 52.1125   | 76.8625   | 0.83                | 0.09            | Aksu                             |                           |
| 3                | 66             | 55.9875   | 92.9125   | 0.73                | 0.10            |                                  | Krasnoyarsk               |
| 4                | 94             | 56.2375   | 90.4125   | 0.64                | 0.08            | Achinsk Alumina Combine          | Achinsk                   |
| 5                | 101            | 55.3625   | 86.0125   | 0.63                | 0.08            | NOVO-KEMEROVO CHP                | Kemerovo                  |
| 6                | 103            | 47.8875   | 106.8125  | 0.63                | 0.15            | Ulaanbaatar-4                    | Ulaanbaatar               |
| 7                | 117            | 52.4875   | 103.9125  | 0.60                | 0.11            | Thermal Power Station 10         | Angarsk                   |
| 8                | 118            | 53.8875   | 87.2375   | 0.60                | 0.12            | West Siberian CHP                |                           |
| 9                | 144            | 45.4625   | 119.5625  | 0.53                | 0.08            | Huolinhe Zhanute                 | Mositai                   |
| 10               | 243            | 53.3375   | 83.6625   | 0.38                | 0.05            | Barnaulskaya CHP Plant-3         | Barnaul                   |

<sup>1</sup> GPPD power plants / WCD cities within 15 km. Here, only the first match is listed. In the original catalog ([https://doi.org/10.26050/WDCC/No\\_xPointEmissionsV2](https://doi.org/10.26050/WDCC/No_xPointEmissionsV2)), all matches are included. Note that the listed power plant or city does not need to represent the actual dominating NO<sub>x</sub> source.

## 8 Middle East

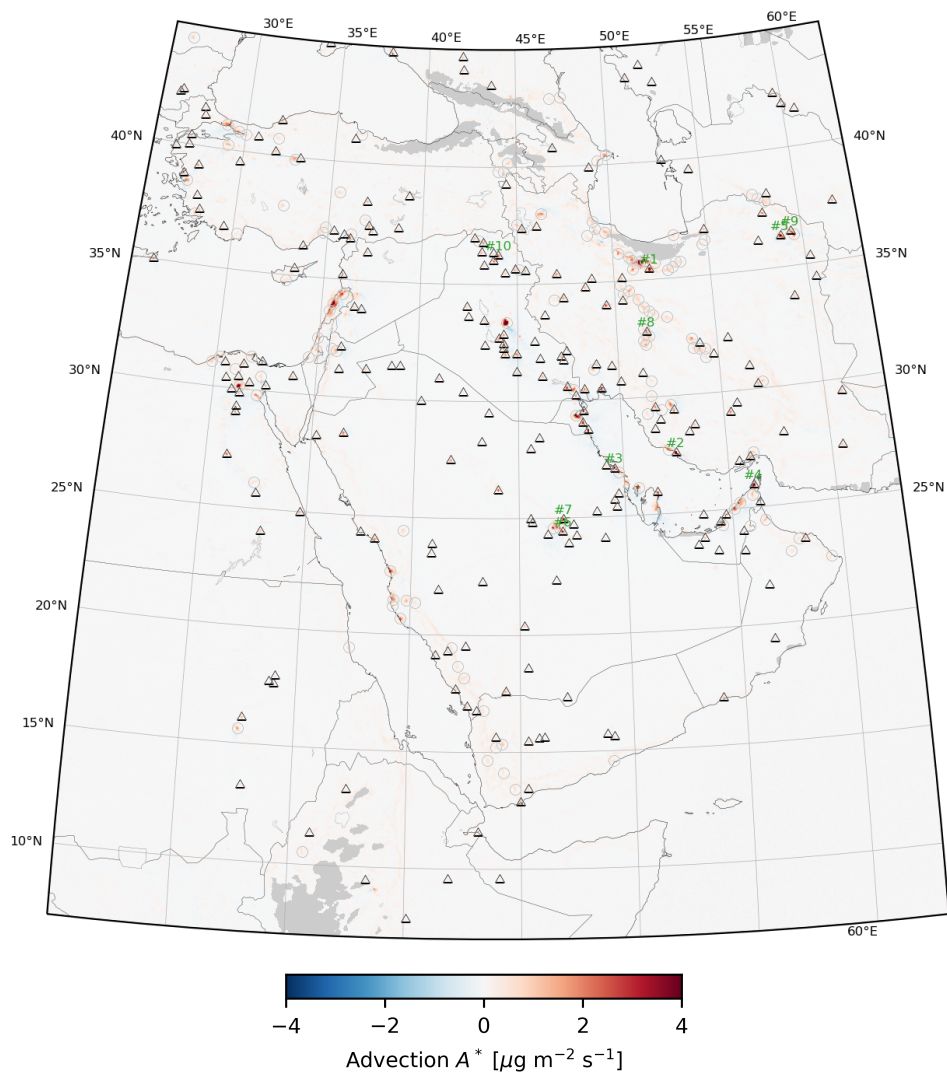

**Figure S8.** Map of  $A^*$  for Middle East. Point sources listed in the catalog v2 are displayed as triangle. The regional top ten emitters are labeled in green. Candidates classified as area source are shown as circle if local advection is larger than  $0.5 \mu\text{g s}^{-1} \text{m}^{-2}$ .

**Table S8.** Catalog v2 extract of ten largest point sources detected in Middle East.

| regional<br>rank | global<br>rank | lat [° N] | lon [° E] | Emissions<br>[kg/s] | Error<br>[kg/s] | Power plants (GPPD) <sup>1</sup> | Cities (WCD) <sup>1</sup> |
|------------------|----------------|-----------|-----------|---------------------|-----------------|----------------------------------|---------------------------|
| 1                | 11             | 35.4375   | 51.8625   | 1.70                | 0.50            | Damavand C.C.                    |                           |
| 2                | 13             | 27.5625   | 52.5375   | 1.66                | 0.41            | Mobin Petroshimi                 |                           |
| 3                | 15             | 27.0375   | 49.5625   | 1.46                | 0.38            | BERI GP                          | Al Jubayl                 |
| 4                | 18             | 25.9625   | 56.1125   | 1.34                | 0.49            |                                  |                           |
| 5                | 20             | 36.3125   | 58.8375   | 1.23                | 0.30            | Neishabour                       | Neyshabūr                 |
| 6                | 28             | 24.4125   | 47.0125   | 1.17                | 0.20            | Riyadh 10                        |                           |
| 7                | 37             | 24.9375   | 47.0625   | 1.03                | 0.16            | Riyadh 9                         |                           |
| 8                | 41             | 32.7875   | 51.4875   | 1.02                | 0.21            | Shahid M. Montazeri              | Khomeynī Shahr            |
| 9                | 42             | 36.4625   | 59.4125   | 0.99                | 0.25            | Ferdosi C.C.                     |                           |
| 10               | 57             | 36.2125   | 44.0125   | 0.83                | 0.19            |                                  | Erbil                     |

<sup>1</sup>GPPD power plants / WCD cities within 15 km. Here, only the first match is listed. In the original catalog ([https://doi.org/10.26050/WDCC/No\\_xPointEmissionsV2](https://doi.org/10.26050/WDCC/No_xPointEmissionsV2)), all matches are included. Note that the listed power plant or city does not need to represent the actual dominating NO<sub>x</sub> source.

## 9 India/Pakistan/West China

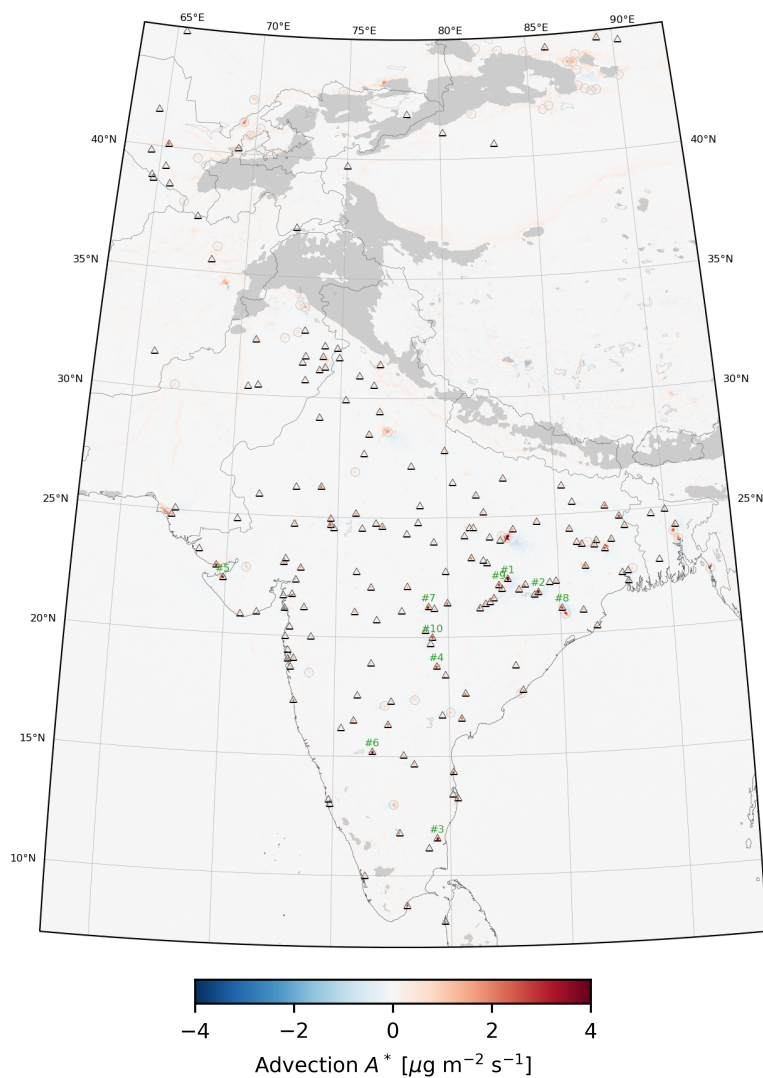

**Figure S9.** Map of  $A^*$  for India/Pakistan/West China. Point sources listed in the catalog v2 are displayed as triangle. The regional top ten emitters are labeled in green. Candidates classified as area source are shown as circle if local advection is larger than  $0.5 \mu\text{g s}^{-1} \text{m}^{-2}$ .

**Table S9.** Catalog v2 extract of ten largest point sources detected in India/Pakistan/West China.

| regional<br>rank | global<br>rank | lat [° N] | lon [° E] | Emissions<br>[kg/s] | Error<br>[kg/s] | Power plants (GPPD) <sup>1</sup> | Cities (WCD) <sup>1</sup> |
|------------------|----------------|-----------|-----------|---------------------|-----------------|----------------------------------|---------------------------|
| 1                | 6              | 22.3875   | 82.6875   | 2.01                | 0.59            | KORBA STPS                       |                           |
| 2                | 17             | 21.7875   | 84.0625   | 1.34                | 0.39            | STERLITE                         |                           |
| 3                | 24             | 11.5625   | 79.4375   | 1.19                | 0.39            | NEYVELI ST II                    |                           |
| 4                | 25             | 18.7625   | 79.4625   | 1.19                | 0.36            | R_GUNDEM STPS                    | Ramgundam                 |
| 5                | 26             | 22.3125   | 69.8625   | 1.18                | 0.21            | SIKKA REP.                       |                           |
| 6                | 31             | 15.1875   | 76.6625   | 1.13                | 0.33            | BELLARY TPS                      |                           |
| 7                | 32             | 21.2625   | 79.1125   | 1.12                | 0.33            | KORADI                           | Nagpur                    |
| 8                | 36             | 21.0875   | 85.0875   | 1.08                | 0.35            | TALCHER STPS                     |                           |
| 9                | 38             | 22.1375   | 82.2875   | 1.03                | 0.29            | SIPAT STPS                       |                           |
| 10               | 39             | 19.9875   | 79.2875   | 1.03                | 0.31            | CHANDRAPUR_Coal                  | Chanda                    |

<sup>1</sup>GPPD power plants / WCD cities within 15 km. Here, only the first match is listed. In the original catalog ([https://doi.org/10.26050/WDCC/No\\_xPointEmissionsV2](https://doi.org/10.26050/WDCC/No_xPointEmissionsV2)), all matches are included. Note that the listed power plant or city does not need to represent the actual dominating NO<sub>x</sub> source.



## 10 East China/South East Asia

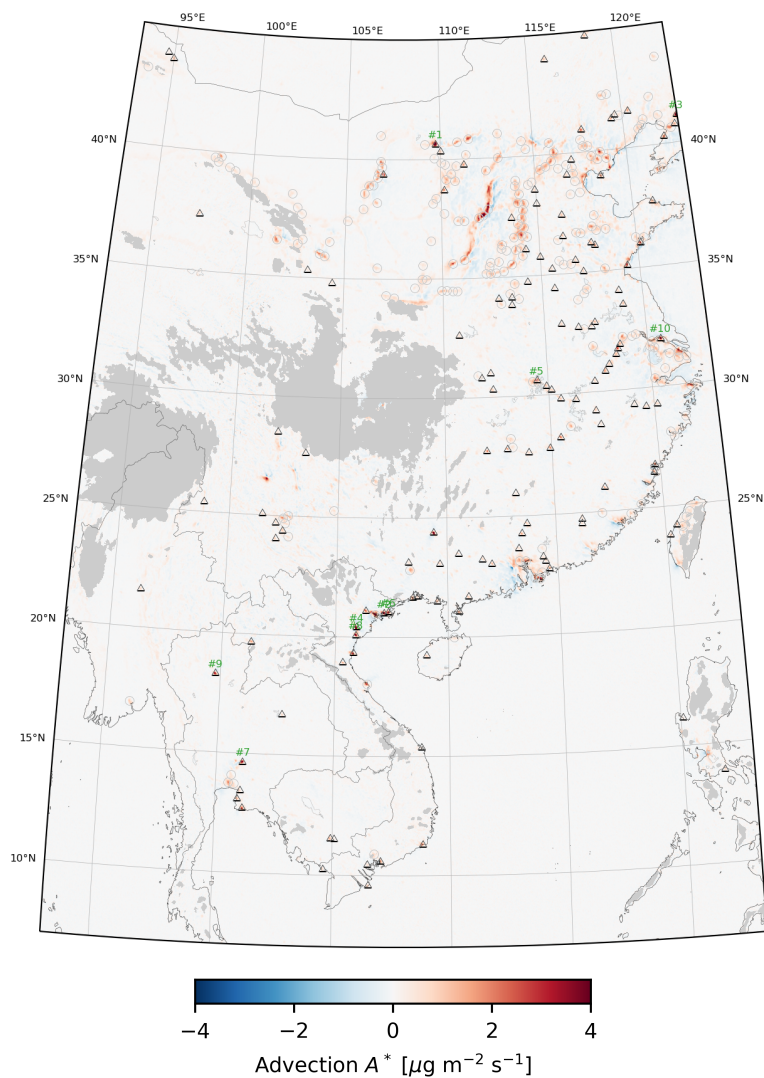

**Figure S10.** Map of  $A^*$  for East China/South East Asia. Point sources listed in the catalog v2 are displayed as triangle. The regional top ten emitters are labeled in green. Candidates classified as area source are shown as circle if local advection is larger than  $0.5 \mu\text{g s}^{-1} \text{m}^{-2}$ .

**Table S10.** Catalog v2 extract of ten largest point sources detected in East China/South East Asia.

| regional<br>rank | global<br>rank | lat [° N] | lon [° E] | Emissions<br>[kg/s] | Error<br>[kg/s] | Power plants (GPPD) <sup>1</sup> | Cities (WCD) <sup>1</sup> |
|------------------|----------------|-----------|-----------|---------------------|-----------------|----------------------------------|---------------------------|
| 1                | 7              | 40.6375   | 109.7375  | 1.81                | 0.57            | Baotou East Hope                 | Baotou                    |
| 2                | 8              | 21.0125   | 107.1375  | 1.80                | 0.42            | Quang Ninh 1                     | Ha Long                   |
| 3                | 14             | 41.1375   | 122.9625  | 1.54                | 0.15            | Anshan Steel Company             | Anshan                    |
| 4                | 16             | 20.4125   | 105.9125  | 1.35                | 0.33            |                                  |                           |
| 5                | 23             | 30.6375   | 114.4625  | 1.20                | 0.24            | Huaneng Yangluo                  |                           |
| 6                | 27             | 21.0625   | 107.3375  | 1.18                | 0.29            | Mong Duong 2                     | Cam Pha                   |
| 7                | 34             | 14.6375   | 101.1125  | 1.10                | 0.31            | Kaeng Khoi 2                     |                           |
| 8                | 35             | 20.0875   | 105.8875  | 1.09                | 0.27            |                                  |                           |
| 9                | 43             | 18.2875   | 99.7625   | 0.99                | 0.35            | Mae Mah                          |                           |
| 10               | 45             | 31.9875   | 120.6375  | 0.97                | 0.15            | Jiangsu Nantong                  | Yangshe                   |

<sup>1</sup>GPPD power plants / WCD cities within 15 km. Here, only the first match is listed. In the original catalog ([https://doi.org/10.26050/WDCC/No\\_xPointEmissionsV2](https://doi.org/10.26050/WDCC/No_xPointEmissionsV2)), all matches are included. Note that the listed power plant or city does not need to represent the actual dominating NO<sub>x</sub> source.

11 East Asia

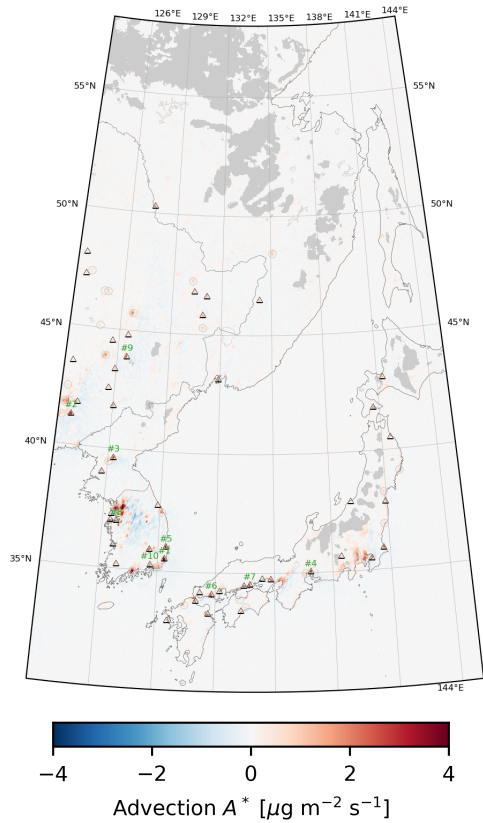

**Figure S11.** Map of  $A^*$  for East Asia. Point sources listed in the catalog v2 are displayed as triangle. The regional top ten emitters are labeled in green. Candidates classified as area source are shown as circle if local advection is larger than  $0.5 \mu\text{g s}^{-1} \text{m}^{-2}$ .

**Table S11.** Catalog v2 extract of ten largest point sources detected in East Asia.

| regional rank | global rank | lat [° N] | lon [° E] | Emissions [kg/s] | Error [kg/s] | Power plants (GPPD) <sup>1</sup> | Cities (WCD) <sup>1</sup> |
|---------------|-------------|-----------|-----------|------------------|--------------|----------------------------------|---------------------------|
| 1             | 30          | 35.5125   | 129.3375  | 1.13             | 0.20         | Ulsan                            | Ulsan                     |
| 2             | 40          | 41.2875   | 123.7125  | 1.03             | 0.16         |                                  | Benxi                     |
| 3             | 55          | 39.6125   | 126.2875  | 0.85             | 0.13         | Pukchang                         |                           |
| 4             | 70          | 35.0375   | 136.8625  | 0.72             | 0.10         | Chita                            | Nagoya                    |
| 5             | 100         | 36.0125   | 129.3875  | 0.63             | 0.08         | Pohang Works                     | Pohang                    |
| 6             | 116         | 34.0875   | 131.7875  | 0.60             | 0.14         | Nanyo Complex                    | Shūnan                    |
| 7             | 124         | 34.5125   | 133.7375  | 0.57             | 0.11         | Tamashima                        | Kurashiki                 |
| 8             | 145         | 36.9875   | 126.7125  | 0.52             | 0.08         | Bugok                            |                           |
| 9             | 162         | 43.8875   | 126.5125  | 0.50             | 0.08         | Songhuajiang                     | Jilin                     |
| 10            | 169         | 35.2375   | 128.6125  | 0.49             | 0.07         |                                  | Changwon                  |

<sup>1</sup> GPPD power plants / WCD cities within 15 km. Here, only the first match is listed. In the original catalog ([https://doi.org/10.26050/WDCC/No\\_xPointEmissionsV2](https://doi.org/10.26050/WDCC/No_xPointEmissionsV2)), all matches are included. Note that the listed power plant or city does not need to represent the actual dominating NO<sub>x</sub> source.

12 Indonesia/Malaysia

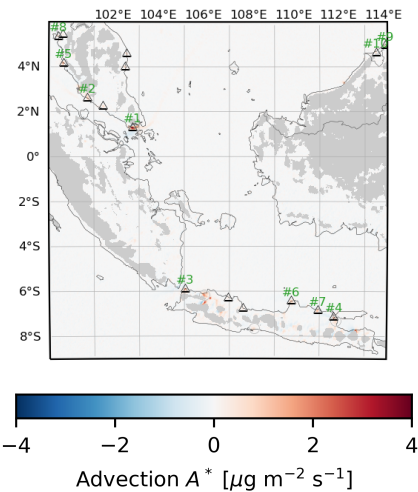

**Figure S12.** Map of  $A^*$  for Indonesia/Malaysia. Point sources listed in the catalog v2 are displayed as triangle. The regional top ten emitters are labeled in green. Candidates classified as area source are shown as circle if local advection is larger than  $0.5 \mu\text{g s}^{-1} \text{m}^{-2}$ .

**Table S12.** Catalog v2 extract of ten largest point sources detected in Indonesia/Malaysia.

| regional<br>rank | global<br>rank | lat [° N] | lon [° E] | Emissions<br>[kg/s] | Error<br>[kg/s] | Power plants (GPPD) <sup>1</sup> | Cities (WCD) <sup>1</sup> |
|------------------|----------------|-----------|-----------|---------------------|-----------------|----------------------------------|---------------------------|
| 1                | 12             | 1.2875    | 103.7125  | 1.70                | 0.61            | Pulau Seraya                     | Singapore                 |
| 2                | 72             | 2.6125    | 101.7125  | 0.71                | 0.35            | Jimah                            |                           |
| 3                | 73             | -5.8875   | 106.0375  | 0.71                | 0.30            | PLTU Suralaya                    | Cilegon                   |
| 4                | 97             | -7.1375   | 112.6375  | 0.64                | 0.25            | PLTGU Gresik                     |                           |
| 5                | 111            | 4.1625    | 100.6375  | 0.62                | 0.28            | Manjung                          |                           |
| 6                | 201            | -6.4375   | 110.7375  | 0.43                | 0.16            | PLTU Tanjung Jati B              |                           |
| 7                | 224            | -6.8625   | 111.9125  | 0.40                | 0.14            | Tanjung Awar-Awar                |                           |
| 8                | 284            | 5.3625    | 100.4125  | 0.33                | 0.16            | TNB Prai                         | Butterworth               |
| 9                | 460            | 4.9375    | 114.9125  | 0.24                | 0.12            | Gadong 2                         |                           |
| 10               | 574            | 4.6375    | 114.4875  | 0.20                | 0.11            | Lumut Cogen                      |                           |

<sup>1</sup> GPPD power plants / WCD cities within 15 km. Here, only the first match is listed. In the original catalog ([https://doi.org/10.26050/WDCC/No\\_xPointEmissionsV2](https://doi.org/10.26050/WDCC/No_xPointEmissionsV2)), all matches are included. Note that the listed power plant or city does not need to represent the actual dominating NO<sub>x</sub> source.

13 Australia

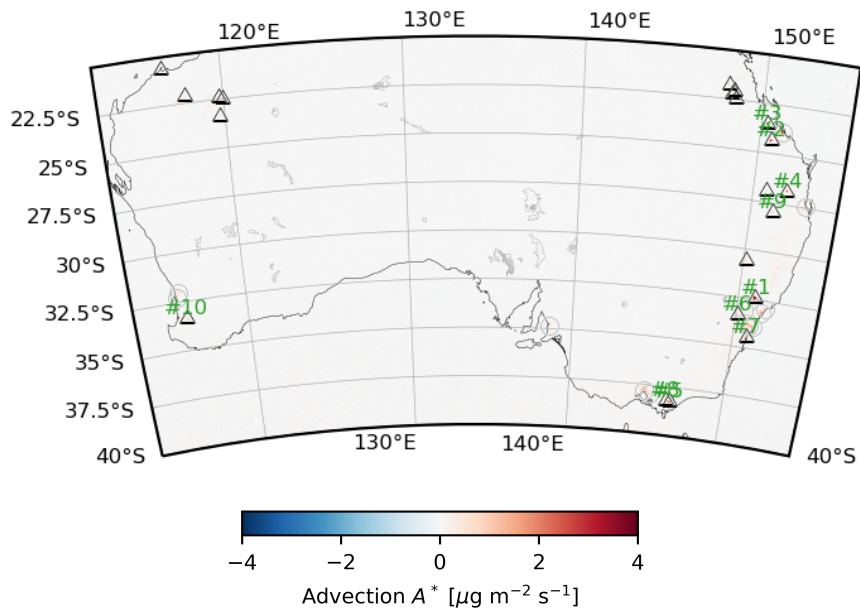

**Figure S13.** Map of  $A^*$  for Australia. Point sources listed in the catalog v2 are displayed as triangle. The regional top ten emitters are labeled in green. Candidates classified as area source are shown as circle if local advection is larger than  $0.5 \mu\text{g s}^{-1} \text{m}^{-2}$ .

**Table S13.** Catalog v2 extract of ten largest point sources detected in Australia.

| regional<br>rank | global<br>rank | lat [° N] | lon [° E] | Emissions<br>[kg/s] | Error<br>[kg/s] | Power plants (GPPD) <sup>1</sup> | Cities (WCD) <sup>1</sup> |
|------------------|----------------|-----------|-----------|---------------------|-----------------|----------------------------------|---------------------------|
| 1                | 10             | -32.4125  | 151.0125  | 1.73                | 0.30            | Bayswater                        |                           |
| 2                | 53             | -24.3375  | 150.6375  | 0.87                | 0.17            | Callide C                        |                           |
| 3                | 86             | -23.5125  | 150.3125  | 0.65                | 0.14            | Stanwell                         |                           |
| 4                | 112            | -26.7875  | 151.9125  | 0.61                | 0.14            | Tarong                           |                           |
| 5                | 129            | -38.2625  | 146.5875  | 0.56                | 0.13            | Loy Yang A                       |                           |
| 6                | 216            | -33.3625  | 150.0625  | 0.41                | 0.08            | Mt Piper                         |                           |
| 7                | 273            | -34.4375  | 150.8375  | 0.34                | 0.05            | Tallawarra                       | Wollongong                |
| 8                | 379            | -38.1875  | 146.3375  | 0.27                | 0.06            | Hazelwood                        |                           |
| 9                | 473            | -27.9625  | 151.2875  | 0.24                | 0.06            | Millmerran                       |                           |
| 10               | 483            | -33.3375  | 116.2375  | 0.23                | 0.04            | Muja D                           |                           |

<sup>1</sup> GPPD power plants / WCD cities within 15 km. Here, only the first match is listed. In the original catalog ([https://doi.org/10.26050/WDCC/No\\_xPointEmissionsV2](https://doi.org/10.26050/WDCC/No_xPointEmissionsV2)), all matches are included. Note that the listed power plant or city does not need to represent the actual dominating NO<sub>x</sub> source.



## 14 Further point sources

In contrast to v1, no pre-selection of “regions of interest” was made in v2. While most of the detected point sources in v2 are covered by the regions defined in v1 (1107 out of 1139), there are 32 further point sources in v2 outside these regions. Table S14 lists the 10 largest emitters.

**Table S14.** Catalog v2 extract of ten largest point sources detected outside the “regions of interest” considered in v1.

| regional<br>rank | global<br>rank | lat [° N] | lon [° E] | Emissions<br>[kg/s] | Error<br>[kg/s] | Power plants (GPPD) <sup>1</sup> | Cities (WCD) <sup>1</sup> |
|------------------|----------------|-----------|-----------|---------------------|-----------------|----------------------------------|---------------------------|
| 1                | 54             | 6.9625    | 79.9375   | 0.86                | 0.32            | CEB Kelantitissa                 | Colombo                   |
| 2                | 78             | 61.2875   | 73.4875   | 0.68                | 0.07            | Surgutskaya GRES-2               | Surgut                    |
| 3                | 133            | -3.9375   | 122.4125  | 0.55                | 0.24            |                                  |                           |
| 4                | 134            | 10.4375   | -61.4875  | 0.55                | 0.17            | Point Lisas                      |                           |
| 5                | 206            | -20.1375  | 57.4625   | 0.42                | 0.14            | Fort William Ceb                 | Port Louis                |
| 6                | 212            | 0.3125    | 32.5875   | 0.41                | 0.28            |                                  | Kampala                   |
| 7                | 248            | -3.0875   | -59.9625  | 0.37                | 0.16            | Aparecida Parte I                | Manaus                    |
| 8                | 261            | -2.6125   | -44.3625  | 0.34                | 0.10            | Porto do Itaqui                  | São Luís                  |
| 9                | 364            | 0.1625    | 117.4875  | 0.28                | 0.13            |                                  | Bontang                   |
| 10               | 410            | 32.3125   | -64.7875  | 0.26                | 0.07            |                                  |                           |

<sup>1</sup> GPPD power plants / WCD cities within 15 km. Here, only the first match is listed. In the original catalog ([https://doi.org/10.26050/WDCC/No\\_xPointEmissionsV2](https://doi.org/10.26050/WDCC/No_xPointEmissionsV2)), all matches are included. Note that the listed power plant or city does not need to represent the actual dominating NO<sub>x</sub> source.
