# Supplementary material for: Improved catalog of NO x point source emissions (version 2)
Source: Copernicus journal article supplement (doi:10.5194/essd-15-3051-2023), 2023-07-18
Supplement: Supplementary file 2 [file essd-15-3051-2023-supplement.zip]

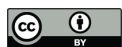

*Supplement of*

## **Improved catalog of NO<sub>x</sub> point source emissions (version 2)**

**Steffen Beirle et al.**

*Correspondence to:* Steffen Beirle ([steffen.beirle@mpic.de](mailto:steffen.beirle@mpic.de))

- [essd-15-3051-2023-supplement-title-page.pdf](#)
- [catalog\\_ESSD.zip](#)
- [supplement\\_point\\_source\\_catalog\\_v2\\_final.pdf](#)

The copyright of individual parts of the supplement might differ from the article licence.
